# Supplementary material for: Faecal neutrophil elastase-antiprotease balance reflects colitis severity
Source: PubMed Central journal article supplement (PMC7039808; doi:10.1038/s41385-019-0235-4), 2019-11-26
Supplement: 41385_2019_235_MOESM1_ESM.pdf [file 41385_2019_235_MOESM1_ESM.pdf]

## Supplementary Materials (Barry et. al., 2019)

### Supplementary Materials and Methods

#### *Enterocyte extraction*

Upon harvest 3.5 cm section of the terminal colon was cut lengthwise and incubated for 45 min at 37°C in 4 ml of enterocyte dissociation buffer (1x Hanks' balanced salt solution without Mg and Ca plus 10 mM HEPES, 1 mM EDTA, and 5 µl/ml 2-β-mercaptoethanol). Enterocytes were harvested by centrifugation at 4°C at 2,000 g, washed twice in PBS, and stored at -80°C until lysis.

#### *Intrarectal administration of Sivelestat*

C3H mice (Charles River Laboratories, Italy) were infected with *C. rodentium* by oral gavage. From 3 to 8 days post-inoculation (dpi) 50 mg/kg of Sivelestat sodium tetrahydrate (Selleck Chemicals) in 5 % DMSO/ 95% PBS or vehicle control was delivered intrarectally to mice under anesthesia (isoflurane). Mice received further Sivelestat on 10-11 dpi.

#### *Sample processing and Histological Analysis*

Histological analysis and immunostaining were performed as described in 1 using antibodies listed in Table S1. Images were acquired using a Zeiss AxioVision Z3 microscope, using an AxioCam MRm camera and processed using Zen 2.3 Blue Version (Carl Zeiss MicroImaging GmbH, Germany). For H&E images of entire colon sections, individual 40 x magnification images were taken as tiles and fused together using Zen. The number of Ly6G positive cells present in the mucosa region of a transverse cross section were manually counted using Zen 2.3 Blue software and data analysed using multiple-comparison one-way Analysis of Variance (ANOVA), Prism 7.

### *TUNEL Assay*

TUNEL staining was performed using DeadEnd™ Fluorometric TUNEL System (Promega) as per manufacturer's instructions. DNA was counterstained with DAPI. Images were acquired as described above. Quantification was performed using Fiji, Image J. The DAPI channel was used to select the area to be quantified (mucosa region of a transverse cross section). TUNEL positive cells in this area were quantified by analysing the number of particles (threshold min: 0, max: 5140; pixels: 20-infinity and roundness 0-1). Counts obtained were analysed using multiple-comparison one-way Analysis of Variance (ANOVA), Prism 7 (Graphpad).

### *Quantitative real-time RT-PCR*

RNA was isolated using RNeasy mini kit (Qiagen) and cDNA synthesised using SuperScript IV VILO Master Mix (ThermoFisher Scientific). Quantitative real-time (RT)-PCR reactions were performed using the FAM-MGB Taqman gene expression probe for SerpinA3N [Cat: #Mm00776439\_m1] and SerpinA3M [Cat: #Mm07306477\_m1] (ThermoFisher Scientific). Relative mRNA levels were calculated after normalisation to VIC-MGB Gapdh [Cat: #Mm99999915\_g1] using the  $\Delta C_t$  method.

### *S100A8 and MPO ELISA*

S100A8 concentration was determined using a DuoSet Mouse S100A8 or MPO ELISA kit (R&D Systems), according to the manufacturer's instructions. Data was analysed using multiple-comparison one-way Analysis of Variance (ANOVA), Prism 7.

### *Generation of neutrophil elastase substrate*

80 mg of Rink Amide resin (0.04 mmol) was activated with 2 mL DCM for 30 min. The resin was filtered and washed with 1 mL DMF (4 x). The Fmoc-protecting group was removed from the resin by treatment with 20% piperidine (PIP) in DMF (3 x 1 mL) for 5 min, 5 min and 25 min. At this stage a ninhydrin test was performed to confirm the Fmoc deprotection reaction had proceeded to completion. Next, Fmoc-ACC-OH (44.1 mg, 0.1 mmol, 2.5 eq.), DICl (15.4  $\mu$ L, 0.1 mmol, 2.5 eq.) and HOBt (13.5 mg, 0.1 mmol, 2.5 eq.) were dissolved in 1 mL of DMF and the mixture was gently shaken for 5 min. The mixture was then poured onto the resin and shaken for 24 h at RT. The resin was then filtered and washed with 1 ml of DMF (3 x), DCM (3 x) and DMF (3 x). A ninhydrin test was performed to check that the reaction had proceeded to completion. The Fmoc group was then removed using the same procedure described previously. Fmoc-Abu-OH (32.5 mg, 0.1 mmol, 2.5 eq.), HATU (38 mg, 0.1 mmol, 2.5 eq.) and 2,4,6-trimethylpyridine (13.1  $\mu$ L, 0.1 mmol, 2.5 eq.) were dissolved in 1 mL of DMF and gently agitated for 5 min. The mixture was then poured on the resin and the vessel was shaken for 24 h at RT. The resin was filtered and washed with 1 mL of DMF (3 x). The coupling was then repeated using half the amount of reagents. The Fmoc group was then removed using the same procedure. Next, Fmoc-Oic-OH (39 mg, 0.1 mmol, 2.5 eq.) was pre-activated with HOBt (15 mg, 0.1 mmol, 2.5 eq.) and DICl (14  $\mu$ L, 0.1 mmol, 2.5 eq.) in 1 mL DMF and added to the resin, followed by gentle agitation for 1 h. A ninhydrin test was carried out after each coupling to check for reaction completion. The resin was filtered and washed with 1 mL of DMF (3 x), DCM (3 x) and DMF (3 x). The Fmoc-protecting group was removed using 20% PIP in DMF (3 x 2 mL) for 3 min per treatment. After the third treatment the resin was washed with 1 mL of DMF (3 x), DCM (3 x) and DMF (3 x). The same procedure was carried out

for coupling of Fmoc-Met(O<sup>2</sup>)-OH and Fmoc-Arg(NO<sub>2</sub>)-OH. The peptide chain was then acetylated with AcOH (12  $\mu$ L, 0.2 mmol, 5 eq.), HBTU (76 mg, 0.2 mmol, 5 eq.) and DIPEA (35  $\mu$ L, 0.2 mmol, 5 eq.) in 1 mL DMF for 1 h. After 1 h, the resin was washed with 1 mL DMF (3 x), DCM (3 x), DMF (3 x), MeOH (3 x) and diethyl ether (3 x) and dried over P<sub>2</sub>O<sub>5</sub> for at least 3 h. The peptide was cleaved from the resin by addition of 2 mL of TFA deprotection mixture (95 % TFA, 2.5 % TIS, 2.5 % H<sub>2</sub>O) and gentle shaking for 2 h. The solution was collected in a 15 mL Falcon tube and the resin was washed once with 1 mL of TFA deprotection mixture. To the 3 mL of deprotection mixture was added 12 mL of cold diethyl ether. After precipitation (1 h, - 20°C) the mixture was centrifuged (5 min, 3000 rpm), washed with cold diethyl ether (4 mL), centrifuged again and left to dry at RT for 3 h. The solid was dissolved in DMSO:CH<sub>3</sub>CN:H<sub>2</sub>O (1:4.5:4.5) and purified by preparative LC-MS (Waters, column: X-Bridge C18, 5  $\mu$ m particle size, 19 mm x 100 mm) using a CH<sub>3</sub>CN:H<sub>2</sub>O gradient. Pure fractions were lyophilized and the resulting solid was dissolved in dry DMSO to a concentrations of 10 mM and stored at -20°C until use.

### *Measurement of K<sub>cat</sub>/K<sub>m</sub>*

Substrates (Table S2) were serially diluted in FPEB and 25  $\mu$ L was added to a 96-well plate. Next, 25  $\mu$ L of mouse recombinant NE (4.6 nM for Ala-Ala-Pro-Val and 2.3 nM for Arg(NO<sub>2</sub>)-Met(O<sup>2</sup>)-Oic-Abu) diluted in NE assay buffer (50 mM Tris, 1 M NaCl, 0.05%(w/v) Brij-35, pH 7.5) was added to each well containing the substrate. The enzyme-substrate reaction was monitored for 10 min using an Envision 2104 Multilabel Plate Reader in kinetic mode, with measurements taken using excitation/emission wavelengths of 355 nm/460 nm. The linear portion of each progress curve was used to calculate relative fluorescence units per second (RFUs<sup>-1</sup>).

$K_M$ ,  $k_{cat}$ , and  $k_{cat}/K_M$  parameters were determined by nonlinear regression in Prism 7 (GraphPad Software). Each experiment was repeated three times and the results are presented as an average  $\pm$  SEM.

#### *Cloning and expression of recombinant Serpina3n*

*Serpina3n* (amino acids 21-418) was PCR amplified from pCMV-SPORT6-*Serpina3n* (primers 1,2; Table S4), digested (*Nco*I and *Xho*I), ligated into pET-M11 (6x His) and transformed into *E. coli* Top10. The sequence verified construct was transformed into *E. coli* BL21 star and cells cultured in 100 ml Lysogeny broth (LB) with kanamycin, induced at OD 0.6 with 1mM IPTG at 20°C O/N. The cells were centrifuged (4550 g, 15 min, 4°C) and pellet frozen at -80°C. Thawed cell pellets were re-suspended in lysis buffer (15ml of Tris-HCl 8.0, 250mM NaCl) and sonicated on ice followed by centrifugation (29,000 g, 20 min, 4 °C. The S/N were applied to pre-equilibrated in lysis buffer TALON His-Tag Purification Resin and incubated for 1 h rotating at 4 °C before applying to a gravity-flow column. The unbound proteins were washed with lysis buffer and bound fractions were eluted with 100mM imidazole in lysis buffer.

#### *Generation of C. rodentium expressing His-tagged SerpinA3N-HlyA fusion*

The amino acid sequence of SerpinA3N lacking signal peptide (amino acids 21-418) was synthesized (GeneArt, ThermoFisher Scientific) and cloned *Nco*I, *Not*I into pEHLA5 (primers 3, 4). To generate pVDL-SerpinA3N the fragment between *Bgl*III site was cloned into pVDL9.3. The homology regions flanking the *xy*I locus were amplified (primers 5-8) and cloned into pSEVA612S generating pSEVA612S-*Xy*I. T0 terminator and promoter PN25 were synthesized and cloned *Sph*I-*Xba*I into pSEVA612S-*Xy*I. *Serpina3n-HlyA, HlyB, HlyD* operon was cloned into this plasmid by

Gibson assembly (primers 9-12) and the final pSEVA612S-Serpina3n was conjugated into wildtype *C. rodentium*. *E. coli* 1047 pRK2013 (20µl) was incubated (2h, 37°C) with CC118-λpir pSEVA612S-SerpinA3N (20µl) on LB agar. 40µl of wildtype *C. rodentium* pACBSR were added (4h, 37°C) and conjugants were selected with appropriate antibiotics. Individual colonies were grown in LB+Sm+L-arabinose (0.4%) (8h, 37°C) and plated. Plasmids and genomic insertions were verified by sequencing.

### *HlyA secretion assay*

Cultures of *E. coli* strain HB2151 carrying pVDL9.3-SerpinA3N (*hlyB*, *hlyD*) and the indicated pEHLA5-derivative were grown overnight (O/N) at 30°C (170 rpm) in liquid LB+Cm. Next, bacteria were inoculated in fresh medium and grown at 37°C (170 rpm) until OD 600 nm reached 0.5. At this point, bacteria were induced with 1 mM isopropyl-1-thio-β-D-galactoside (IPTG) and further incubated for 6 h with agitation (100 rpm). For the purification of the secreted His-tagged SerpinA3N-HlyA fusion, supernatants from induced cultures were loaded onto chromatography columns with pre-equilibrated Cobalt-containing resin (Qiagen). Columns were washed with PBS buffer and eluted with the same buffer containing 150 mM imidazole. Fractions eluted from metal-affinity chromatography were dialysed against HEPES-buffer and concentrated in a 3 kDa centrifugal filter unit (Amicon Ultra-15, Merck). Protein concentration was estimated using Qubit™ Protein Assay Kit (Thermo).

### *Growth curves*

Saturated overnight cultures of bacterial strains were washed twice in M9 minimal media by centrifugation (2000 g, 5 minutes) and resuspension. Washed cultures were

diluted to an OD of 0.1 to a final volume of 100ul in M9 minimal media and OD600nm measured in a plate reader (FLUOstar Omega, BMG Labtech) at 1 hr intervals at 37°C, shaking at 200rpm between measurements.

## Supplementary Tables

**Table S1: List of antibodies used in this study**

| <b>Antibody</b>        | <b>Species</b> | <b>Concentration</b>          | <b>Source</b>       |
|------------------------|----------------|-------------------------------|---------------------|
| SerpinA3N              | Goat           | Western blotting: 0.1 µg/ml   | R&D Systems, AF4709 |
| SLPI                   | Goat           | Western blotting: 0.1 µg/ml   | R&D Systems, AF1735 |
| HSP90α                 | Mouse          | Western blotting: 0.1 µg/ml   | Santa Cruz, F-2     |
| Ly6G                   | Rat            | Immunofluorescence: 2.5 µg/ml | Biolegend, 1A8      |
| Neutrophil Elastase/NE | Sheep          | Immunofluorescence: 1 µg/ml   | R&D Systems, AF4517 |
| <i>C. rodentium</i>    | Rabbit         | 1:200 dilution                | 1                   |



**Table S2: List of reagents used in this study**

| Reagent                                                                 | Source                                                                |
|-------------------------------------------------------------------------|-----------------------------------------------------------------------|
| Mouse recombinant neutrophil elastase (NE)                              | R&D, 4517-SE                                                          |
| human NE                                                                | Enzo Life Sciences, SV-20927-01                                       |
| Cathepsin C                                                             | Sigma, C8511                                                          |
| Dextran sulphate sodium (DSS; MW: 36,000-50,000)                        | MP Biomedicals                                                        |
| MeOSuc-Ala-Ala-Pro-Val-AMC substrate                                    | Bachem, 4005227                                                       |
| MeOSuc-Arg(NO <sub>2</sub> )-Met(O <sub>2</sub> )-Oic-Abu-ACC substrate | Generated in this study. The chemical structure provided in. Fig S3B. |

**Table S3: Disease activity index (DAI) for DSS**

| <b>SCORE</b>             | <b>0</b> | <b>1</b>                | <b>2</b>       | <b>3</b>         |
|--------------------------|----------|-------------------------|----------------|------------------|
| <b>Weight loss</b>       | <1%      | 1-5%                    | 5-15%          | >15%             |
| <b>Stool consistency</b> | normal   | loose                   | Very loose     | Watery diarrhoea |
| <b>Hematochezia</b>      | No blood | Visible blood on pellet | Gross bleeding | -                |

**Table S4: List of primers used in this study**

| Number | Name              | Sequence                                                                  |
|--------|-------------------|---------------------------------------------------------------------------|
| 1      | rSerpA3NpETFwd    | CATGCCATGGGATTCCCAGATGGCACGTTGG                                           |
| 2      | rSerpA3NpETRev    | CCGCTCGAGTCATTTGGGGTTGGCTATCTT                                            |
| 3      | 5-NcoI-SerpA3N    | ATGCCCATGGGACCAGATGGCACGTTGGGAATGG                                        |
| 4      | 3-NotI-SerpA3N    | CGATGCGGCCGCTTTGGGGTTGGCTATCTTGGC                                         |
| 5      | 5-HindIII-XylE-UP | ACTAGAAGCTTCTATTGCAGCAACCGCTTTG                                           |
| 6      | 3-SphI-XylE-UP    | ACTTGCATGCACGCAGTACACCAGCAGCTG                                            |
| 7      | 5-SacI-XylE-DO    | ACTTGAGCTCCCGTCTTTCAGCAGTTTGTC                                            |
| 8      | 3-EcoRI-XylE-DO   | ACTTGAATTCAAGTAGTTTGCCAGCCACTG                                            |
| 9      | 5-GB-pVDL-Serp-I  | TCCAAGAAGGAGATATACATATGGCTCATCACCATCACCA                                  |
| 10     | 3-GB-pVDL-Serp-I  | ACGGGAGCTCGGTACCCGGGTTAACGTCATGTAACTTTCTG                                 |
| 11     | 5-GB-pVDL-Serp-P  | AAAGTTTACATGAGCGTTAACCCGGGTACCGAGCTCCCGTCTT<br>TCAGCAGTTTGTCCGCATTAACGTGG |
| 12     | 3-GB-pVDL-Serp-P  | TGGTGATGGTGATGAGCCATATGTATATCTCCTTCTTGGATCC<br>GCGGCCGCTCTAGAACTCC        |

**Table S5: List of plasmids and strains used in this study**

| Strain/plasmid                      | Description                                                                                                                                                                                                                                                                                                     | Reference                      |
|-------------------------------------|-----------------------------------------------------------------------------------------------------------------------------------------------------------------------------------------------------------------------------------------------------------------------------------------------------------------|--------------------------------|
| pCMV-SPORT6-<br><i>Serpina3n</i>    | MGC Mouse <i>Serpina3n</i> cDNA in pCMV-SPORT6 vector                                                                                                                                                                                                                                                           | Dharmacon,<br>CloneID: 4160649 |
| pEHLA5                              | ApR; pUC ori, lac promoter, N-terminal His tag, VHH, HA and E-tags, C-HlyA                                                                                                                                                                                                                                      | 2                              |
| pVDL9.3                             | CmR; expression of HlyB and HlyD                                                                                                                                                                                                                                                                                | 3                              |
| pVDL- <i>Serpina3n</i>              | CmR; expression of HlyB and HlyD. Expresses <i>Serpina3n</i> inducible with IPTG                                                                                                                                                                                                                                | This study                     |
| pSEVA612S                           | GmR; R6K ori, oriT, I-SceI restriction sites flanking multicloning site                                                                                                                                                                                                                                         | 4                              |
| pSEVA612S-<br><i>Serpina3n</i>      | GmR; R6K ori, oriT, I-SceI restriction sites flanking Xyle HR, T0-PN25- <i>Serpina3n</i> -HlyB-HlyD for constitutive secretion of <i>Serpina3n</i>                                                                                                                                                              | This study                     |
| pACBSR                              | SpR/SmR; p15A ori, PBAD, I-SceI endonuclease and $\lambda$ -red genes inducible with 0.4% L-arabinose                                                                                                                                                                                                           | 5                              |
| DH10B-T1R                           | (F <sup>-</sup> $\lambda$ <sup>-</sup> ) <i>mcrA</i> $\Delta$ <i>mrr</i> - <i>hsdRMS</i> - <i>mcrBC</i> $\phi$ 80 <i>lacZ</i> $\Delta$ M15, $\Delta$ <i>lacX74</i> , <i>recA1</i> , <i>endA1</i> , $\Delta$ ( <i>ara</i> , <i>leu</i> )7697 <i>galU</i> <i>galK</i> <i>rpsL</i> (StrR), <i>nupG</i> <i>tonA</i> | Novagen-Merck                  |
| ICC169                              | Wild-type <i>C. rodentium</i> , O152 serotype, <i>NalR</i>                                                                                                                                                                                                                                                      | 6                              |
| <i>E. coli</i> CC118- $\lambda$ pir | $\Delta$ ( <i>ara-leu</i> ) <i>araD</i> $\Delta$ <i>lacX74</i> <i>galE</i> <i>galK</i> <i>phoA20</i> <i>thi</i> - <i>rpsE</i> <i>rpoB</i> <i>argE</i> (Am) <i>recA1</i> , $\lambda$ pir                                                                                                                         | 7                              |
| <i>E. coli</i> 1047<br>pRK2013      | Helper strain for conjugation, KanR, oriColE1 RK2-<br>Mob+ RK2-Tra+                                                                                                                                                                                                                                             | 8                              |
| HB2151                              | $\Delta$ <i>lac</i> - <i>pro</i> , <i>ara</i> , <i>nalR</i> , <i>thi</i> , F'(proAB <i>lacI</i> Q <i>lacZ</i> $\Delta$ M15)                                                                                                                                                                                     | 9                              |

## **Supplementary References**

1. Crepin, V. F., Collins, J. W., Habibzay, M. & Frankel, G. *Citrobacter rodentium* mouse model of bacterial infection. *Nat Protoc* **11**, 1851–1876 (2016).
2. Ruano-Gallego, D., Fraile, S., Gutierrez, C. & Fernández, L. Á. Screening and purification of nanobodies from *E. coli* culture supernatants using the hemolysin secretion system. *Microb. Cell Fact.* (2019).
3. Tzschaschel, B. D., Guzmán, C. A., Timmis, K. N. & Lorenzo, V. De An escherichia coli hemolysin transport system-based vector for the export of polypeptides: Export of shiga-like toxin iieb subunit by *Salmonella typhimurium aroa*. *Nat. Biotechnol.* (1996).
4. Martinez-Garcia, E., Aparicio, T., Goni-Moreno, A., Fraile, S. & Lorenzo, V. de SEVA 2.0: an update of the Standard European Vector Architecture for de-/re-construction of bacterial functionalities. *Nucleic Acids Res* **43**, D1183-9 (2015).
5. Herring, C. D., Glasner, J. D. & Blattner, F. R. Gene replacement without selection: Regulated suppression of amber mutations in *Escherichia coli*. *Gene* (2003).
6. Wiles, S. *et al.* Organ specificity, colonization and clearance dynamics in vivo following oral challenges with the murine pathogen *Citrobacter rodentium*. *Cell. Microbiol.* (2004).
7. Herrero, M., Lorenzo, V. de & Timmis, K. N. Transposon vectors containing non-antibiotic resistance selection markers for cloning and stable chromosomal insertion of foreign genes in gram-negative bacteria. *J. Bacteriol.* (1990).
8. Figurski, D. H. & Helinski, D. R. Replication of an origin-containing derivative of plasmid RK2 dependent on a plasmid function provided in trans. *Proc. Natl. Acad. Sci. U. S. A.* (1979).
9. Carter, P., Bedouelle, H. & Winter, G. Improved oligonucleotide site-directed mutagenesis using M13 vectors. *Nucleic Acids Res.* (1985).

### **Supplementary Figure legends**

**Figure S1: Colonic crypt hyperplasia in C57 and C3H mice.** Crypt lengths measured from hematoxylin and eosin (H&E)-stained colon sections, n = 10. Kruskal-Wallis multiple comparisons test, \*\*\*  $P \leq 0.001$ .

**Figure S2: Immunofluorescence staining of infected colon tissue sections. (A)** Colon sections from infected C57 (8 dpi) and C3H (6 dpi) mice stained with Dapi (blue), Ly6G antibody (magenta) and neutrophil elastase (NE) antibody (white). 100x magnification, scale = 20 $\mu$ M. Arrows indicate neutrophils as determined by nuclear lobes (dapi) and Ly6G positivity. **(B)** NE staining of tissue sections from uninfected and infected mice. Top row DAPI (blue), NE (white) and *C. rodentium* (green). Bottom row is NE only. Scale = 20 $\mu$ M

**Figure S3: Validation of NE substrates and recombinant SerpinA3N. (A)** Samples from Fig. 2C incubated with the commercially available NE substrate (Ala-Ala-Pro-Val). A single time-point measurement taken at 2 hours is plotted as arbitrary fluorescence units (AFU) / 1000 for each individual sample. Multiple comparisons one-way ANOVA was performed \*\*\*  $P \leq 0.001$ . **(B)** Chemical structure of the Arg(NO<sub>2</sub>)-Met(O<sub>2</sub>)-Oic-Abu substrate **(C)**  $k_{cat}/K_M$  plots of the commercial (Ala-Ala-Pro-Val) and optimised (Arg(NO<sub>2</sub>)-Met(O<sub>2</sub>)-Oic-Abu) NE substrates. Results are presented as an average  $\pm$  SEM, n=3.  $K_M$ ,  $k_{cat}$ , and  $k_{cat}/K_M$  parameters as determined by nonlinear regression in GraphPad Prism 5. **(D)** Coomassie stain of recombinant SerpinA3N following TALEN purification. **(E)** Varying amounts of recombinant SerpinA3N or BSA was incubated with 5 nM recombinant NE for 30 min prior to the addition of NE substrate. Arbitrary fluorescence units (AFU) measured over time are plotted.

**Figure S4: Faecal NE activity reflects disease severity in DSS-induced colitis.**

(A) Histological analysis of colonic sections of DSS-treated mice and representative images of TUNEL stained tissue sections, green: TUNEL, blue; Dapi. (B) Colon length measured on harvest, Multiple comparison one-way ANOVA, \*\*\*  $P \leq 0.001$ . (C) Weight of mice presented as percentage of starting weight throughout DSS treatment,  $n = 8$ . (D) DAI based on sum of weight loss, diarrheal and hematochezia scores. (E) Levels of MPO in faeces from C57 mice treated with 1.5% and 3% DSS as determined by ELISA. Multiple comparison one-way ANOVA, \*  $P \leq 0.05$ .

**Figure S5: SLPI is expressed by IECs but not detected in faecal samples.**

Western blot analysis of IECs and faecal samples from uninfected (UI) and infected (8 dpi) C57 mice using anti-SLPI and anti-SerpinA3N antibodies.

**Figure S6: Calprotectin levels are significantly elevated during infection from day 4.**

Levels of S100A8 (calprotectin) in faeces from infected C3H mice over time as determined by ELISA. Multiple comparison one-way ANOVA, \*  $P \leq 0.05$ , \*\*  $P \leq 0.01$ , \*\*\*  $P \leq 0.001$ .

**Figure S7: ICC2031 grows equivalent to wildtype *C. rodentium* in minimal media and does not affect colonic crypt hyperplasia *in vivo*.**

(A) Wildtype *C. rodentium* and ICC2031 were grown overnight in M9 minimal media and OD600 readings measured over time. Black line = wildtype, grey line = ICC2031. (B) Crypt lengths measured from hematoxylin and eosin (H&E)-stained colon sections. No significant difference (unpaired t test).

**Figure S8: Intrarectal administration of Sivelestat reduces colitis severity in infected C3H mice.** (A) Intrarectal (IR) administration of Sivelestat does not affect intestinal colonisation of *C. rodentium*. Colonisation as measured by CFU/gram of stool. Data are represented as mean  $\pm$  SD,  $n \geq 8$ . (B) Faecal NE activity in samples collect from mice 3 hrs post intrarectal injection of Sivelestat or vehicle control at 11 dpi. Mann-Whitney test. \*  $P \leq 0.05$ . (C) Diarrhoeal score of mice infected with *C. rodentium* and treated with Sivelestat or vehicle control over time; combined data from two biological repeats,  $n \geq 8$ . Multiple t test, non-significant. (D) Survival curve of mice infected with *C. rodentium* and treated daily with Sivelestat or vehicle control.



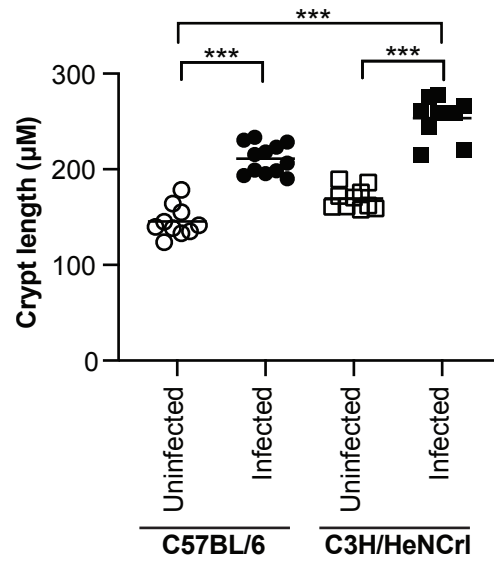

Figure S1

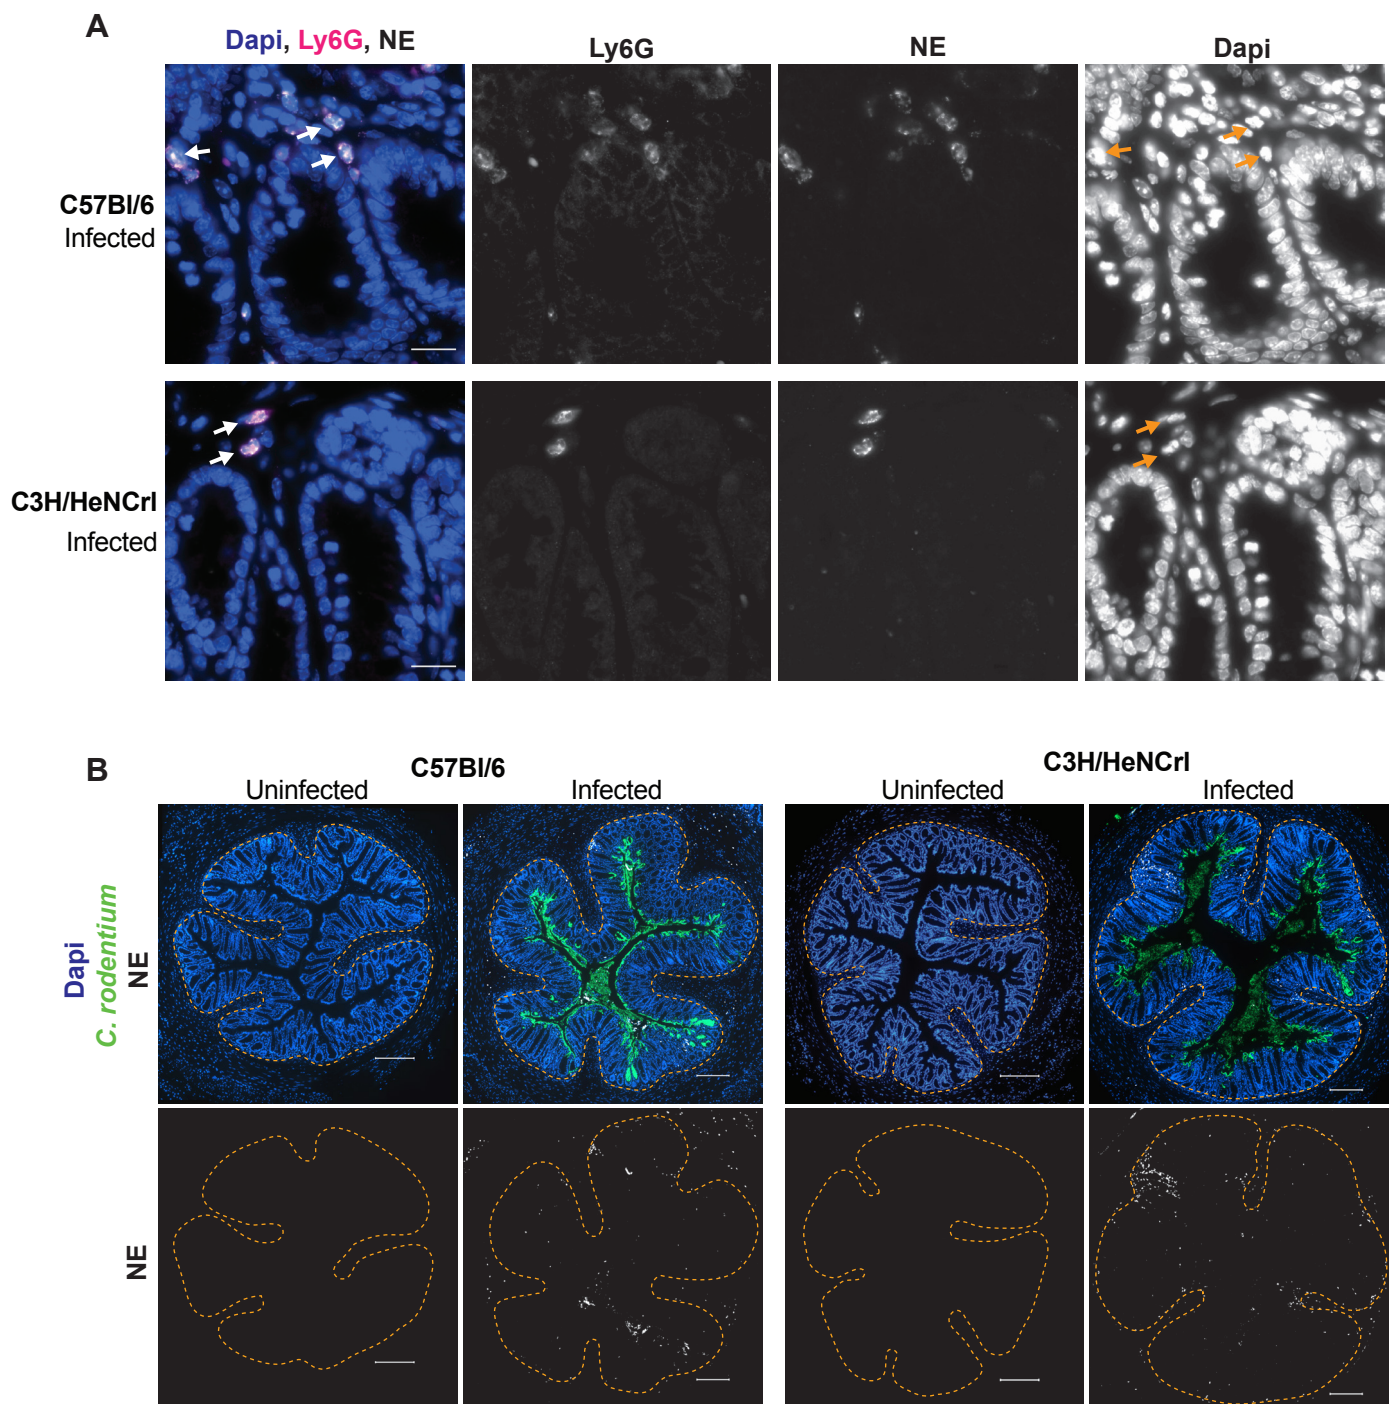

Figure S2

### A NE Activity (commercial substrate)

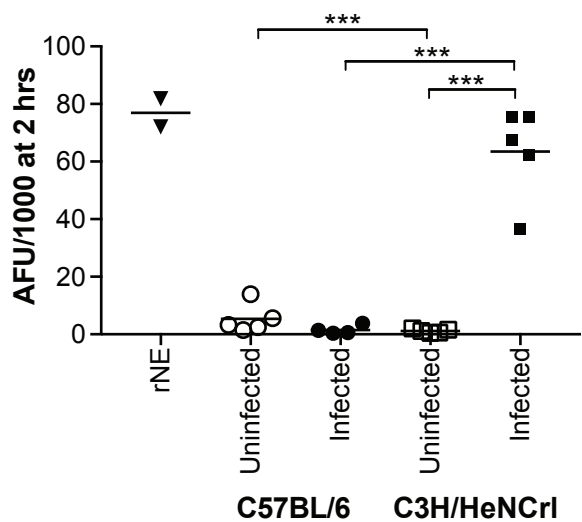

### B

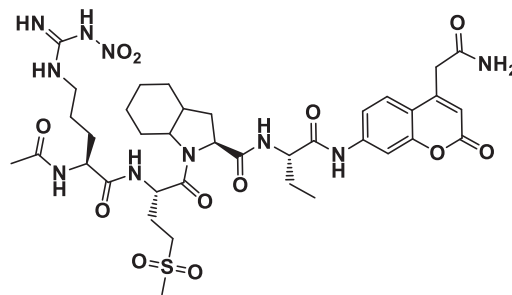

### C

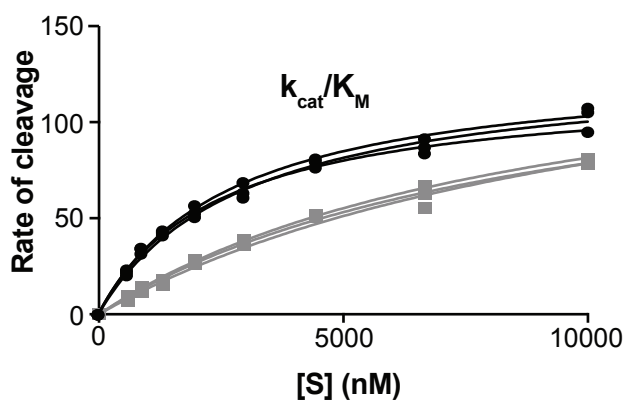

| Substrate                                          | $k_{cat}/K_M$ ( $\times 10^6$ , M <sup>-1</sup> s <sup>-1</sup> ) |
|----------------------------------------------------|-------------------------------------------------------------------|
| Arg(NO <sub>2</sub> )-Met(O <sub>2</sub> )-Oic-Abu | 20.3 ± 0.7                                                        |
| Ala-Ala-Pro-Val                                    | 0.35 ± 0.02                                                       |

### D

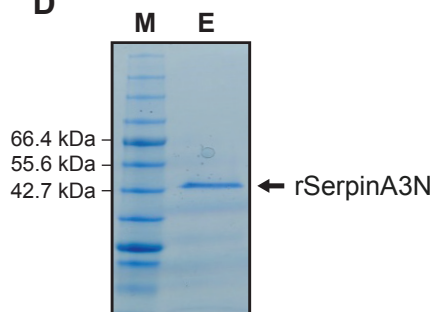

### E

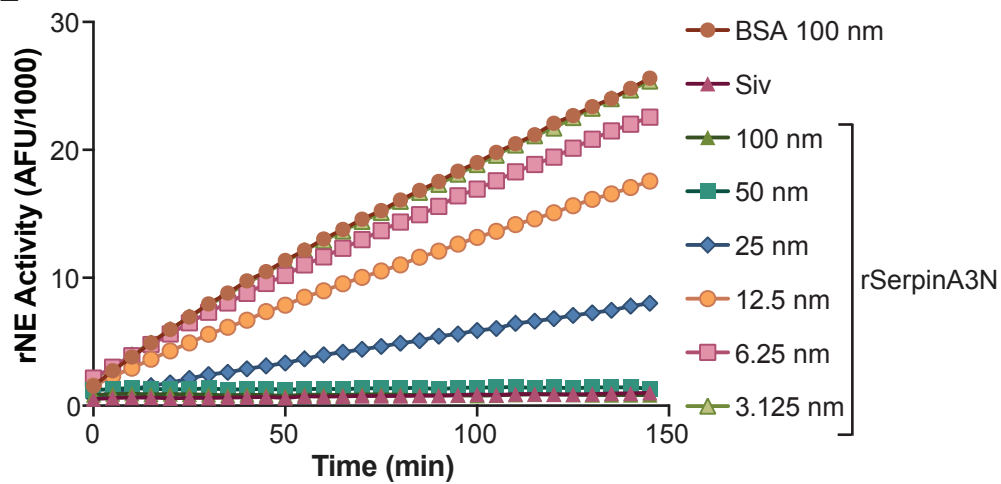

Figure S3

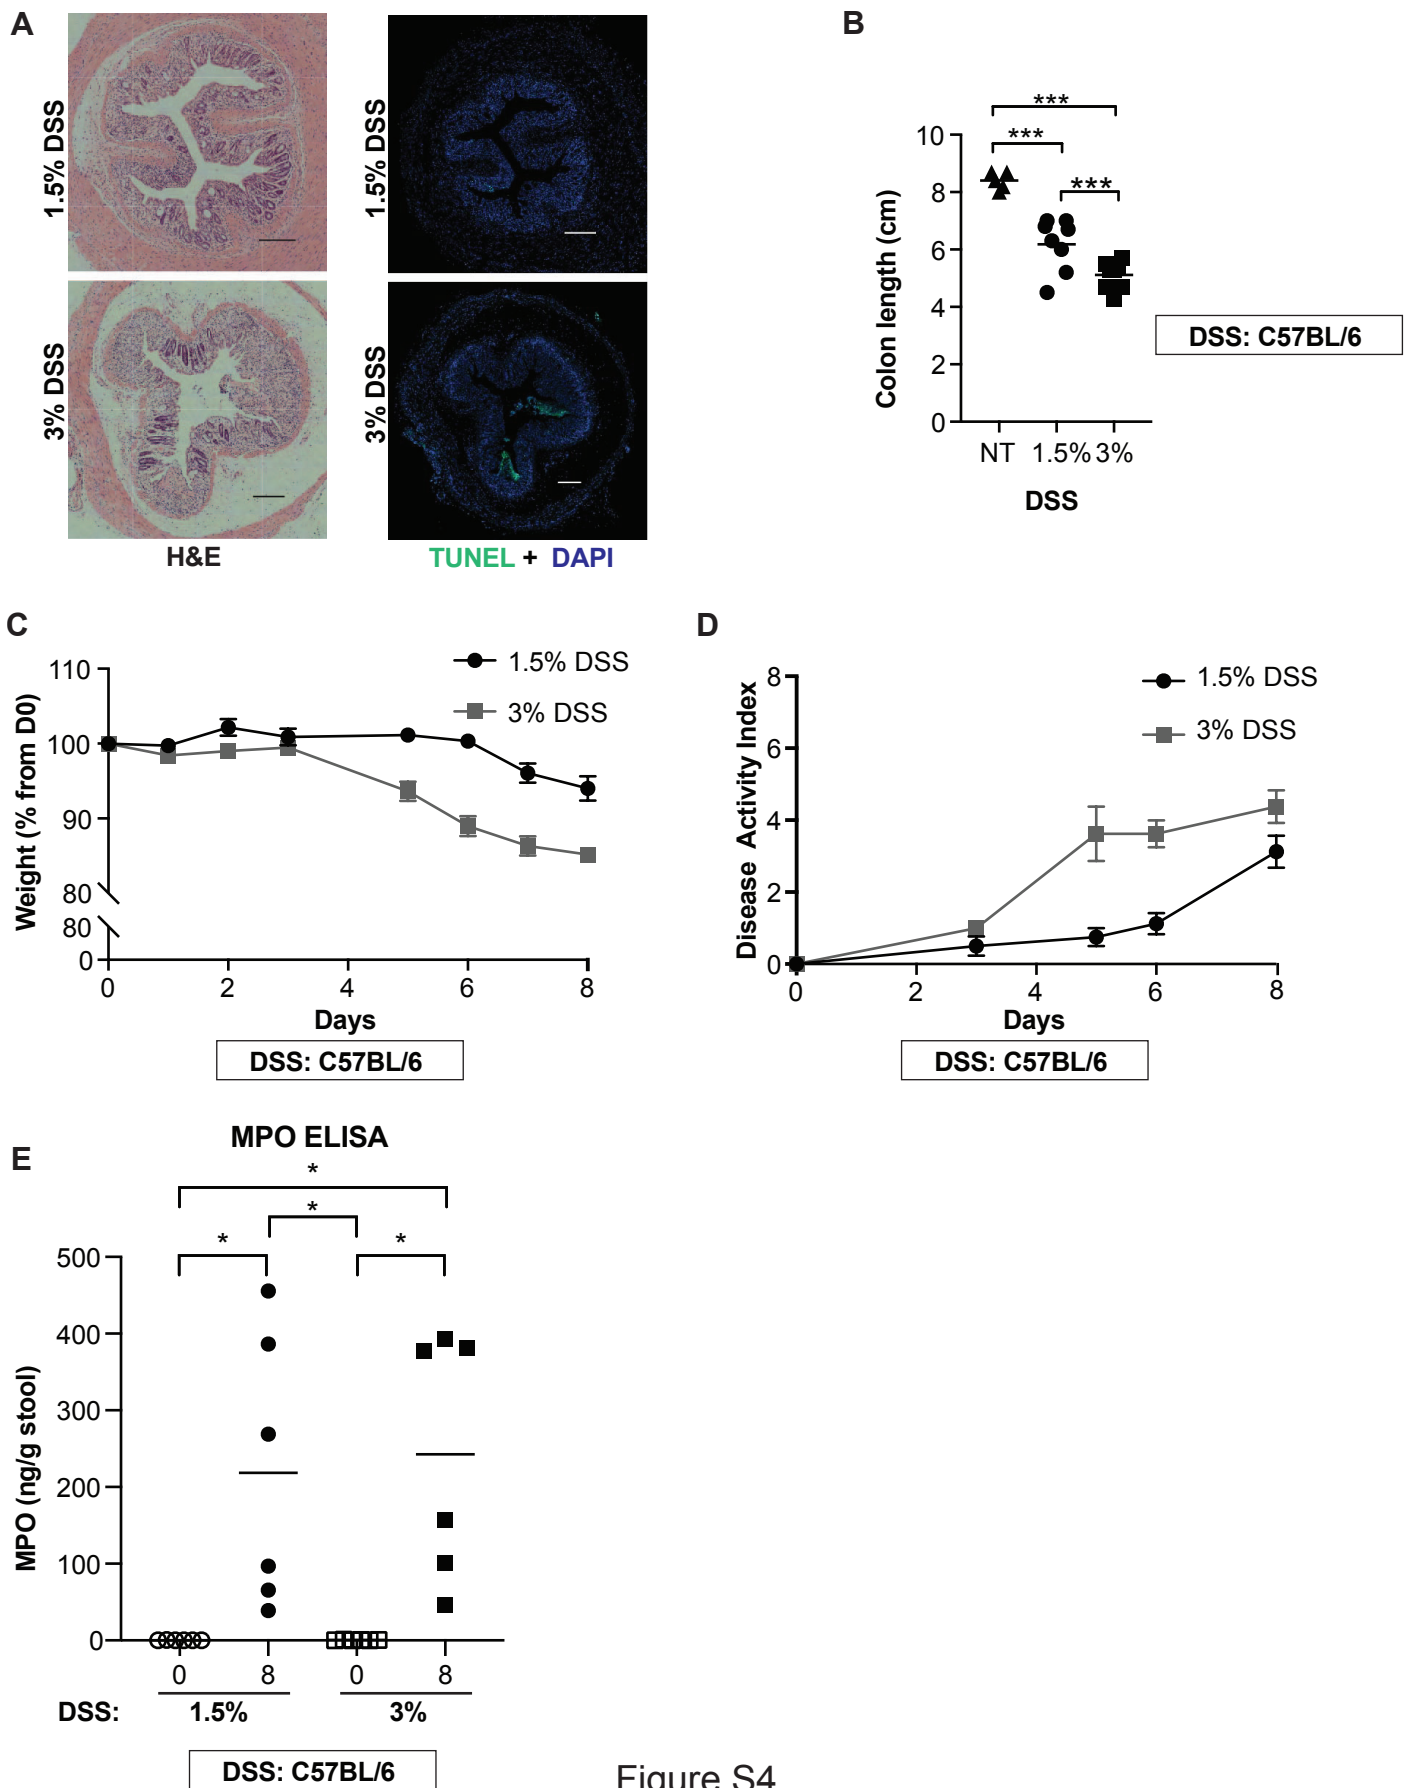

Figure S4

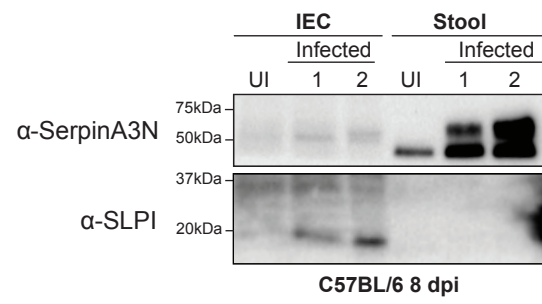

Figure S5

# Calprotectin

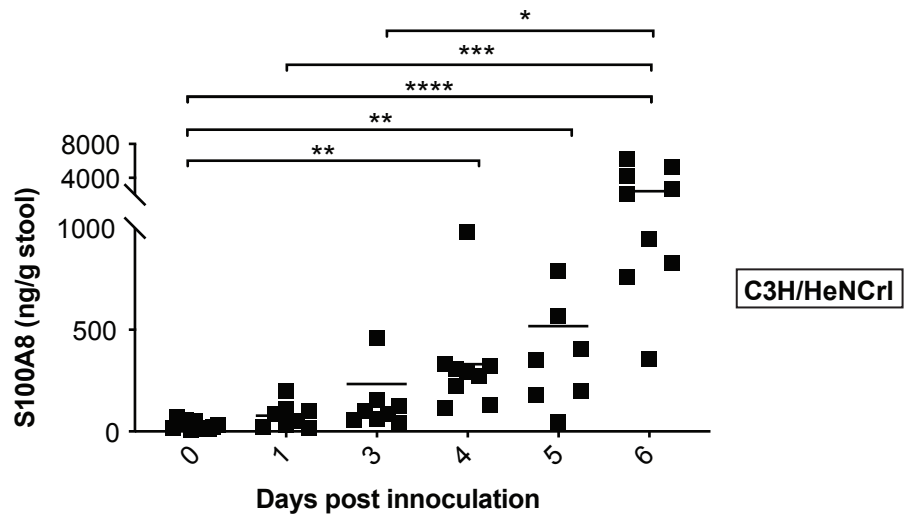

Figure S6

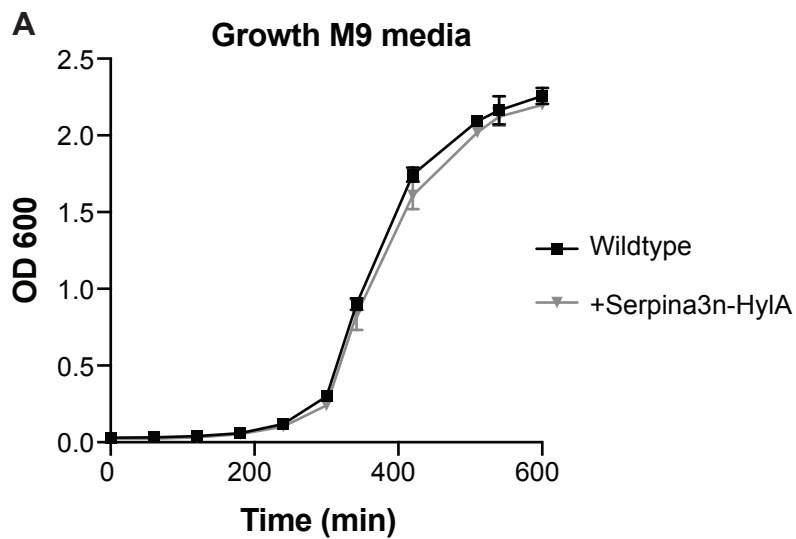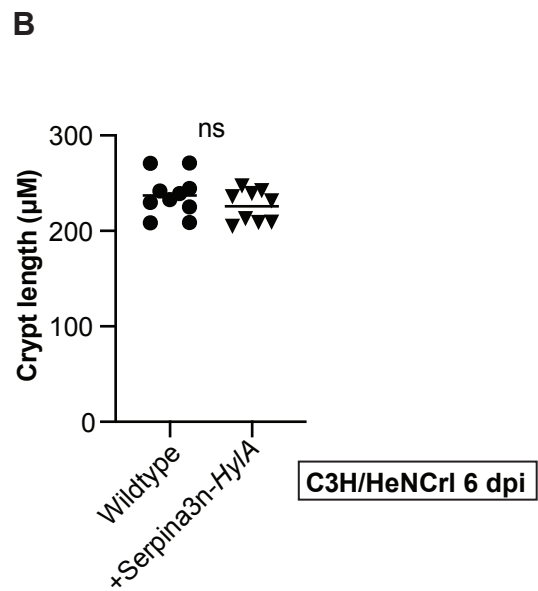

Figure S7

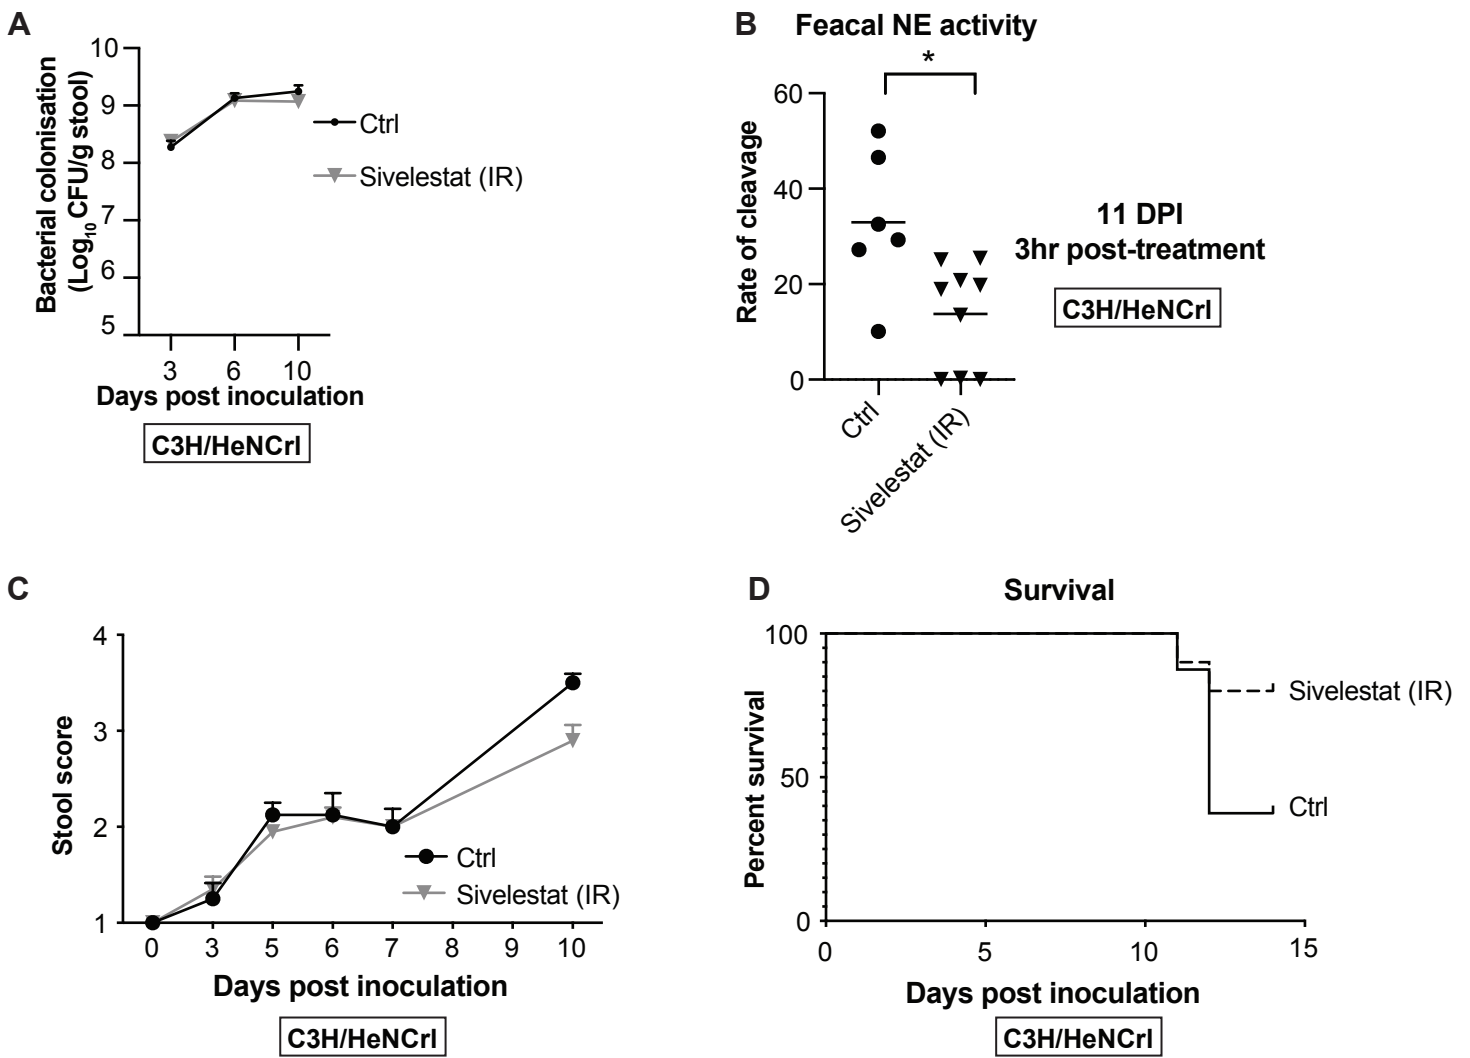

Figure S8
